# Supplementary material for: Influence of the substituent on the phosphine ligand in novel rhenium(i) aldehydes. Synthesis, computational studies and first insights into the antiproliferative activity
Source: Royal Society of Chemistry journal article supplement (doi:10.1039/c8dt03160f), 2018-01-01
Supplement: c8dt03160f1.pdf [file c8dt03160f1.pdf]

## Electronic Supporting Information (ESI) for Dalton Transactions

2018

### **Influence of the substituent on the phosphine ligand in novel rhenium (I) aldehydes. Synthesis, computational studies and first insights into antiproliferative activity**

Michelle Muñoz-Osses<sup>a</sup>, Daniel Siegmund<sup>d</sup>, Alejandra Gómez<sup>a</sup>, Fernando Godoy<sup>a, \*</sup>, Angélica Fierro<sup>c</sup>, Leonel Llanos<sup>b</sup>, Daniel Aravena<sup>b</sup> and Nils Metzler-Nolte<sup>d, \*</sup>

---

<sup>a</sup> Laboratory of Organometallic Chemistry, Faculty of Chemistry and Biology, Universidad de Santiago de Chile, Avenida Libertador Bernardo O'Higgins 3363. Estación Central. Santiago. Chile. E-mail: [michelle.munoz@usach.cl](mailto:michelle.munoz@usach.cl) ; [fernando.godoy@usach.cl](mailto:fernando.godoy@usach.cl); [alejandra.gomez@usach.cl](mailto:alejandra.gomez@usach.cl)

<sup>b</sup> Laboratory of Computational Inorganic Chemistry, Faculty of Chemistry and Biology, Universidad de Santiago de Chile, Avenida Libertador Bernardo O'Higgins 3363. Estación Central. Santiago. Chile. E-mail: [leonel.llanos@usach.cl](mailto:leonel.llanos@usach.cl) ; [daniel.aravena.p@usach.cl](mailto:daniel.aravena.p@usach.cl)

<sup>c</sup> Laboratory of Molecular Simulation, Department of Organic Chemistry, Faculty of Chemistry, Pontificia Universidad Católica de Chile, Avda. Vicuña Mackenna 4860, Macul, Santiago, Chile. E-mail: [afierroh@uc.cl](mailto:afierroh@uc.cl)

<sup>d</sup> Inorganic Chemistry I – Bioinorganic Chemistry, Faculty of Chemistry and Biochemistry, Ruhr University Bochum, Universitätsstrasse 150, 44797 Bochum, Germany. E-mail: [nils.metzler-nolte@rub.de](mailto:nils.metzler-nolte@rub.de); [daniel.Siegmund@ruhr-uni-bochum.de](mailto:daniel.Siegmund@ruhr-uni-bochum.de)

## Index

### Experimental Section:

1. Synthesis and characterization of novel rhenium (I) dicarbonyl phosphine aldehydes.
  - a) NMR Spectrum of **2a-2c** compounds.
  - b) Electrochemical studies
  - c) Computational studies of rhenium (I) derivatives.
2. Cytotoxic studies of the new compounds in two cancer cell lines: HT-29 and PT-45.

### 1. Novel Rhenium dicarbonyl phosphine aldehydes $[(\eta^5\text{-C}_5\text{H}_4\text{CHO})\text{Re}(\text{CO})_2\text{PR}_3]$ .

#### a) NMR Spectra

##### a.1. Synthesis of $[(\eta^5\text{-C}_5\text{H}_4\text{CHO})\text{Re}(\text{CO})_2\text{PMe}_3]$ (**2a**)

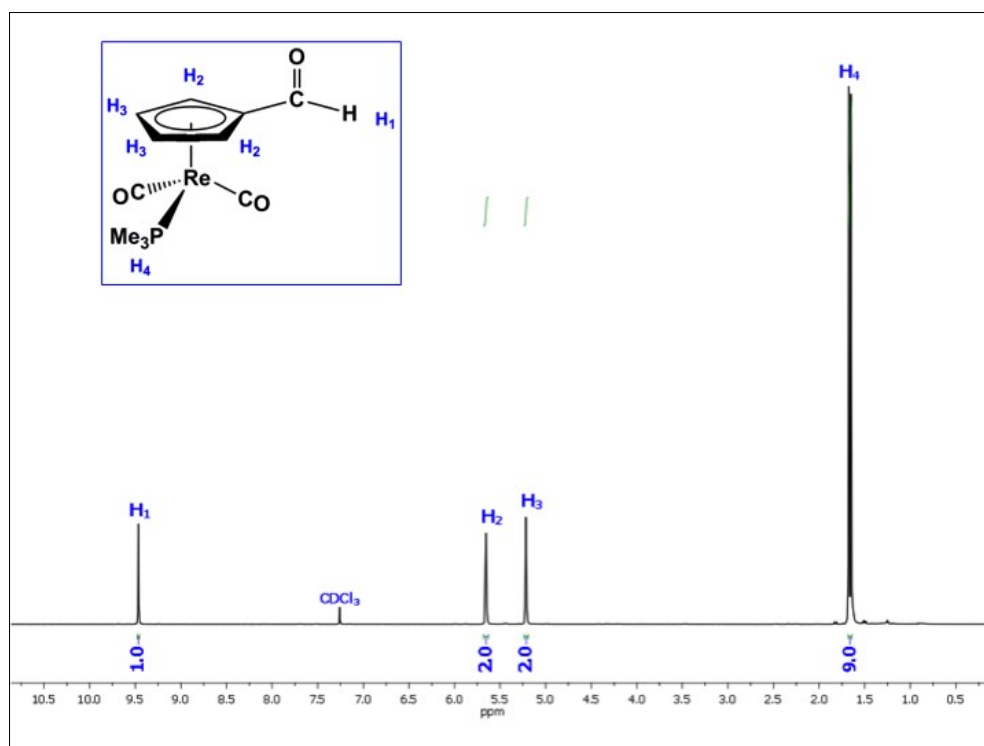

**Figure S1.**  $^1\text{H}$ -NMR spectra (400 MHz) of a solution of **2a** (40 mM) in  $\text{CDCl}_3$  at 298 K.

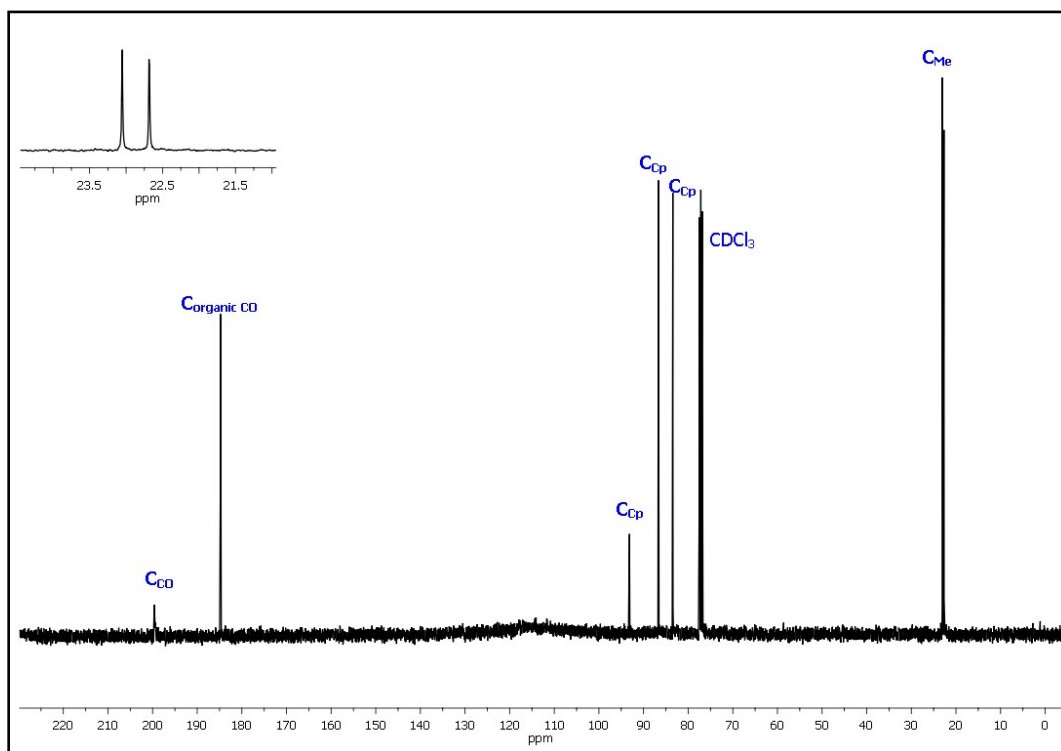

**Figure S2.**  $^{13}\text{C}$ -NMR spectra (400 MHz) of a solution of **2a** (80 mM) in  $\text{CDCl}_3$  at 298 K.

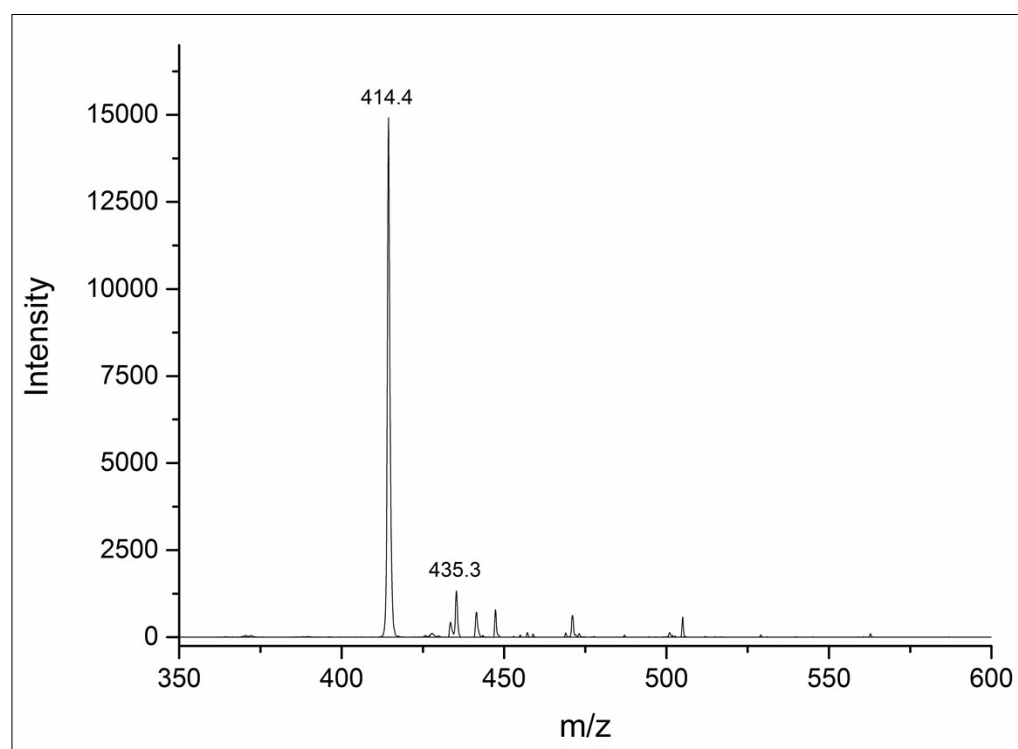

**Figure S3.** ESI-MS in  $\text{CH}_3\text{CN}$  of **2a** (1 mg/ml).

a.2. Synthesis of  $[(\eta^5\text{-C}_5\text{H}_4\text{CHO})\text{Re}(\text{CO})_2\text{PPh}_3]$  (**2b**)

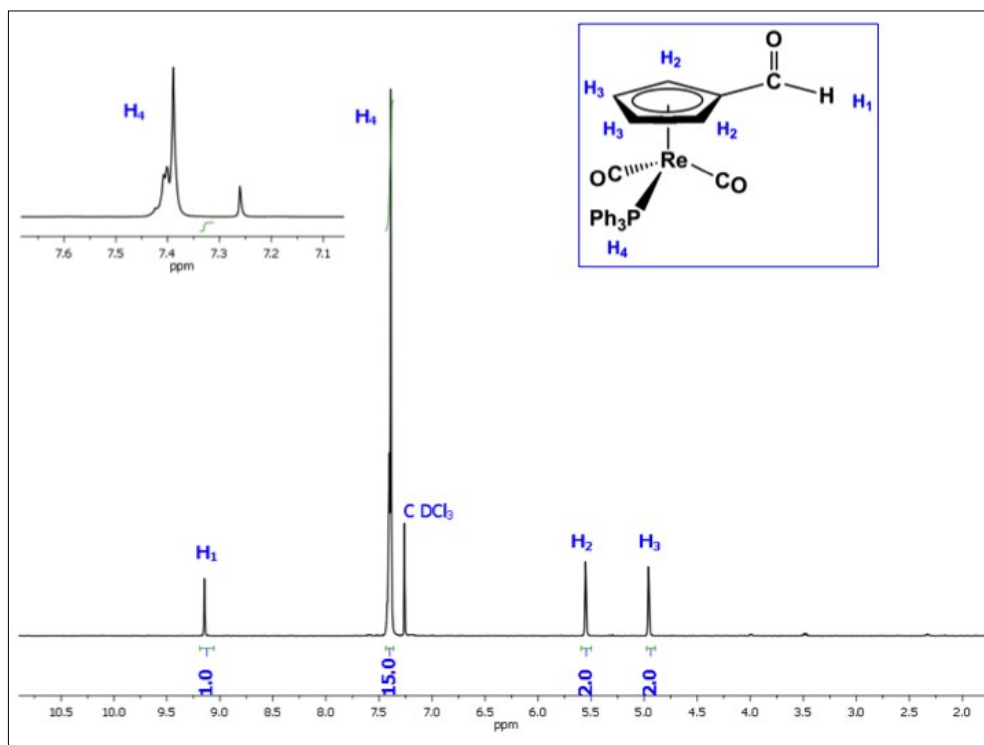

Figure S4.  $^1\text{H}$ -NMR spectra (400 MHz) of a solution of **2b** (40 mM) in  $\text{CDCl}_3$  at 298 K.

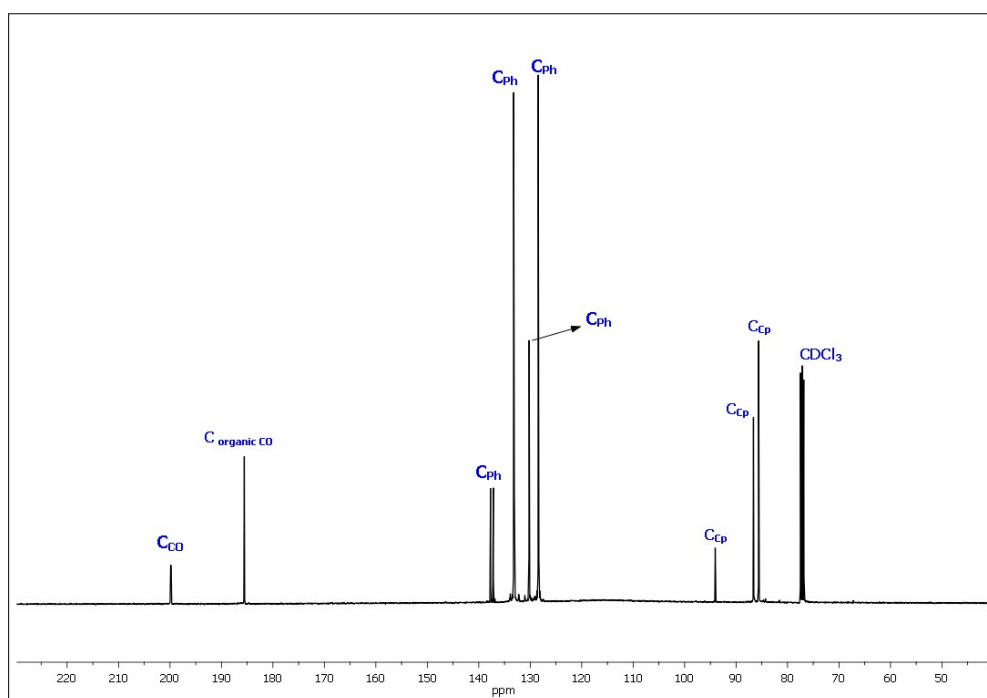

Figure S5.  $^{13}\text{C}$ -NMR spectra (400 MHz) of a solution of **2b** (80 mM) in  $\text{CDCl}_3$  at 298 K.

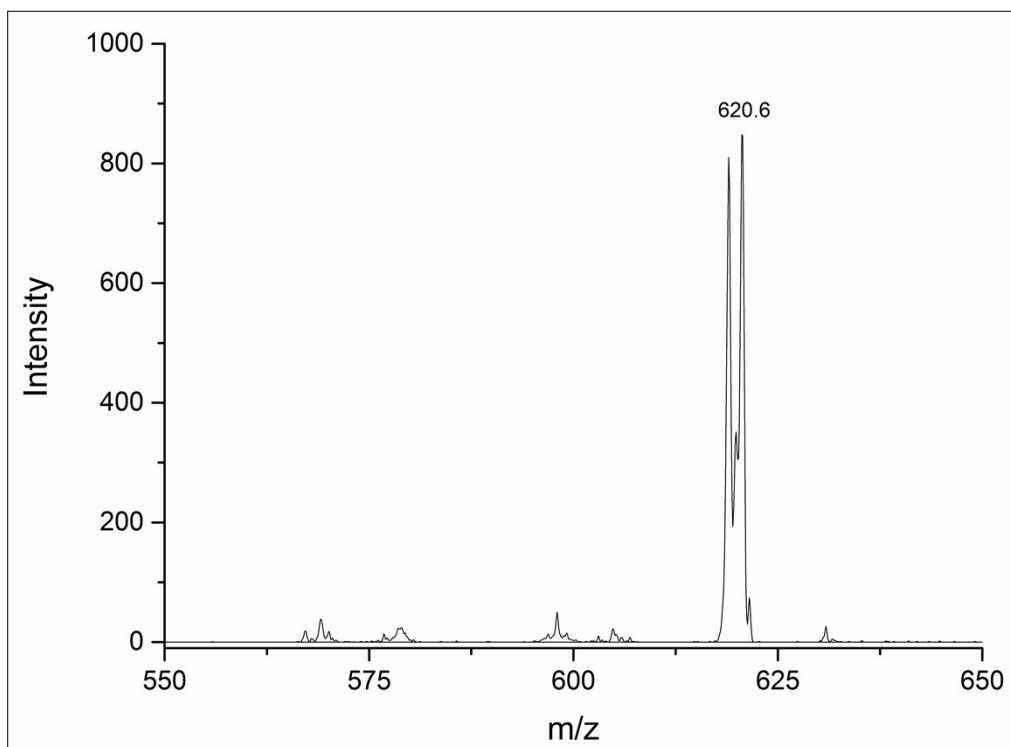

**Figure S6.** ESI-MS in CH<sub>3</sub>CN of **2b** (1mg/ml).

**a.3. Synthesis of  $[(\eta^5\text{-C}_5\text{H}_4\text{CHO})\text{Re}(\text{CO})_2\text{PCy}_3]$  (**2c**)**

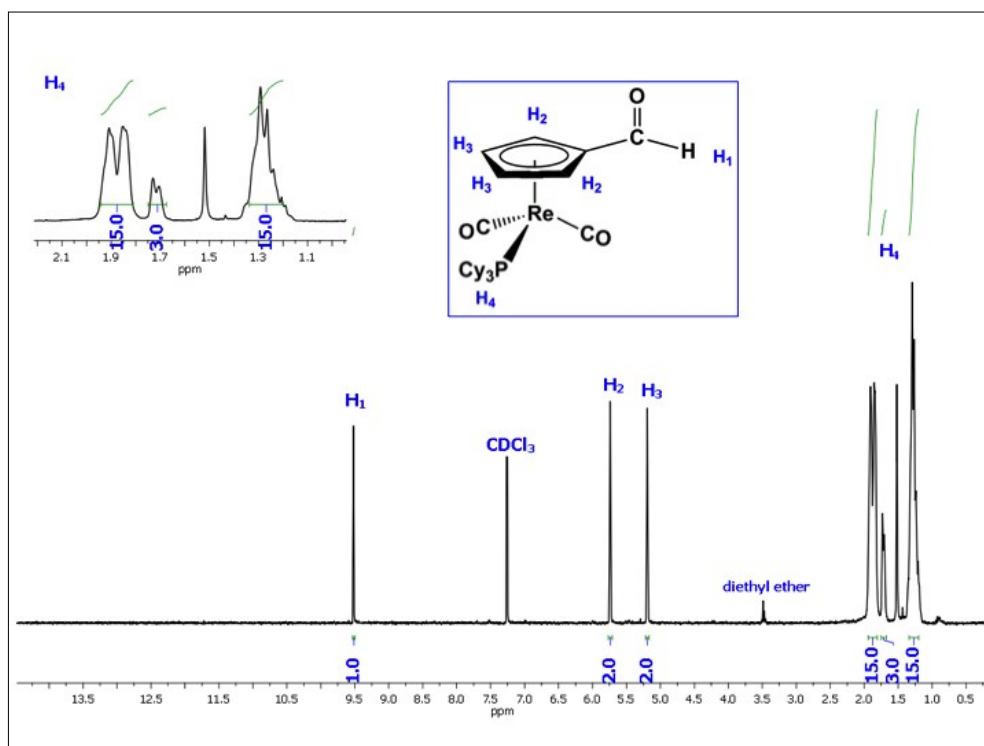

**Figure S7.** <sup>1</sup>H-NMR spectra (400 MHz) of a solution of **2c** (40 mM) in CDCl<sub>3</sub> at 298 K.

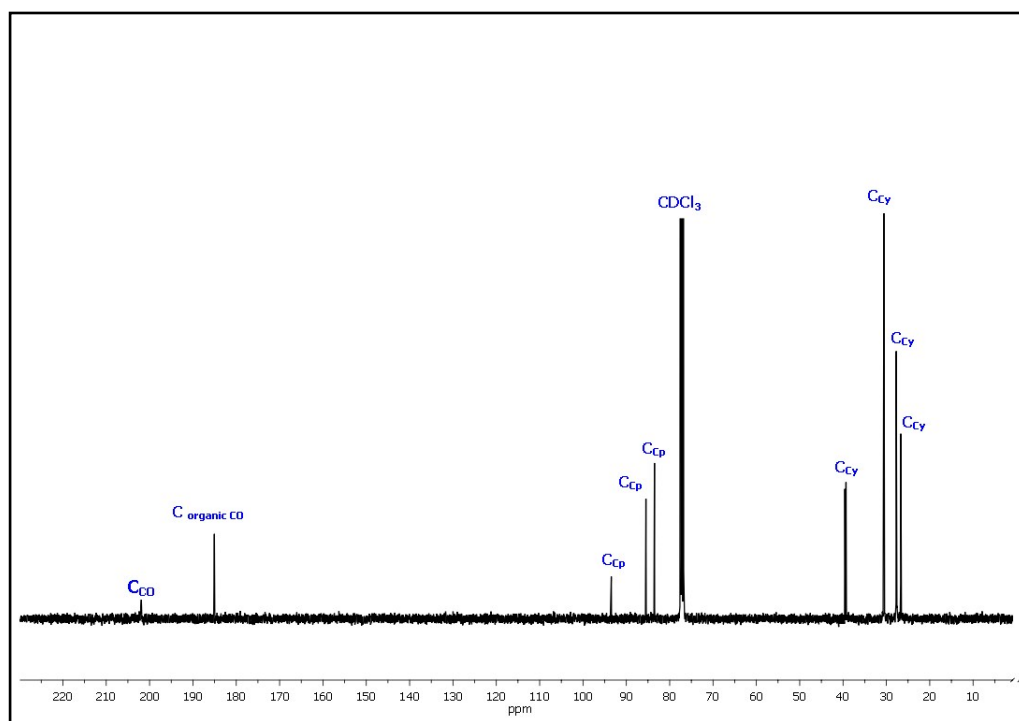

**Figure S8.**  $^{13}\text{C}$ -NMR spectra (400 MHz) of a solution of **2c** (80 mM) in  $\text{CDCl}_3$  at 298 K.

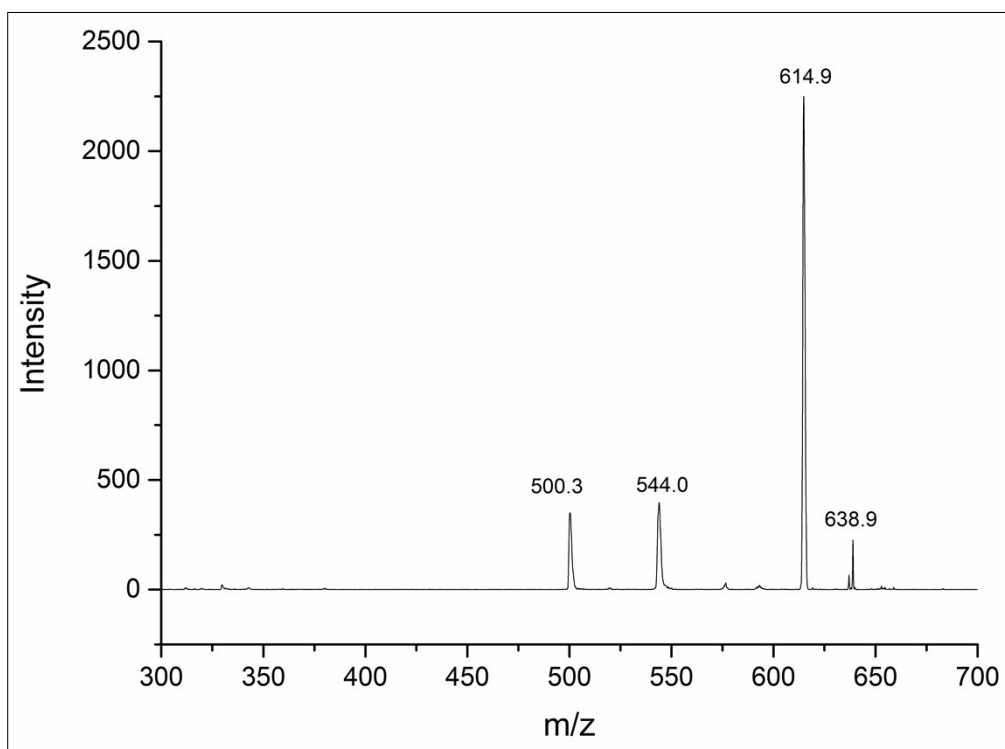

**Figure S9.** ESI-MS in  $\text{CH}_3\text{CN}$  of **2c** (1 mg/ml).

## b) Electrochemical studies

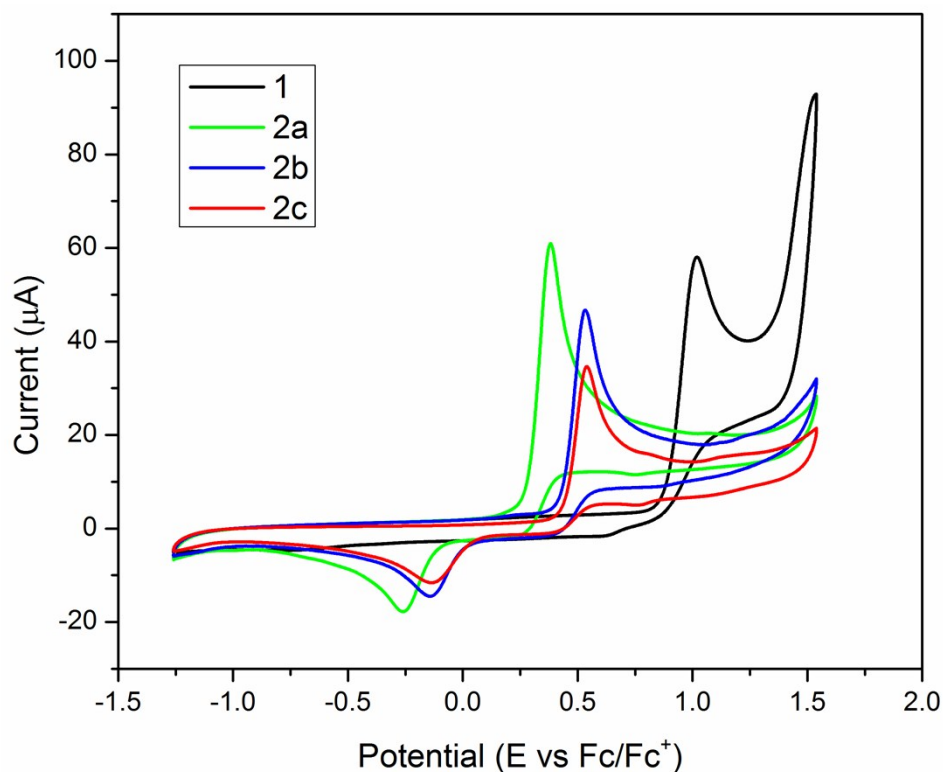

**Figure S10.** Cyclic voltammetry of phosphine derivatives **1** and **2a-c** (1mM), in dry CH<sub>3</sub>CN using Bu<sub>4</sub>NPF<sub>6</sub> (0.1 M) as the supporting electrolyte, at a scan rate of 100 mV/s.

## c) Computational studies

**Table S1:** Experimental and calculated (DFT) frequencies  $\nu_{\text{CO}}$  (cm<sup>-1</sup>) of the symmetric and asymmetric stretching of the organometallic carbonyl ligand of each complex.

| Compounds | Experimental | Calculated |
|-----------|--------------|------------|
| <b>1</b>  | 2033, 1940   | 2048, 1944 |
| <b>2a</b> | 1935, 1867   | 1944, 1854 |
| <b>2b</b> | 1942, 1876   | 1957, 1872 |
| <b>2c</b> | 1928, 1860   | 1939, 1852 |

**Table S2:** Re-P distances from the DFT optimized structures

| Compounds | Re-P (Å) |
|-----------|----------|
| <b>2a</b> | 2.36409  |
| <b>2b</b> | 2.36168  |
| <b>2c</b> | 2.40032  |

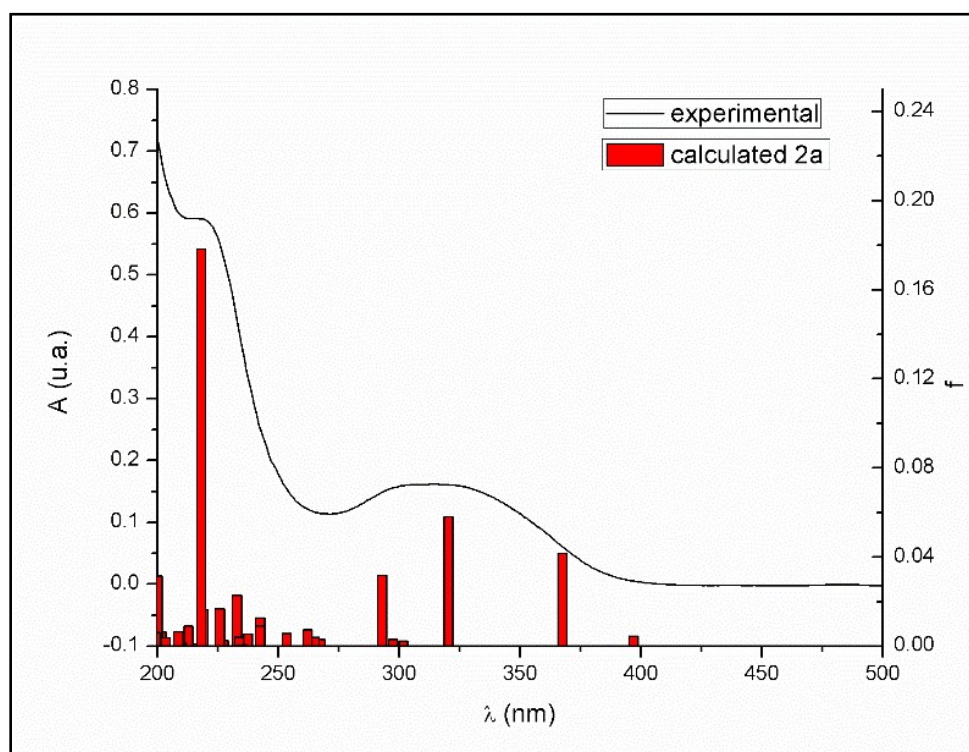

**Figure S11.** Experimental UV-Vis spectrum (black line) and electronic transitions (red bars) obtained for TD-DFT calculations of the complex **2a**.



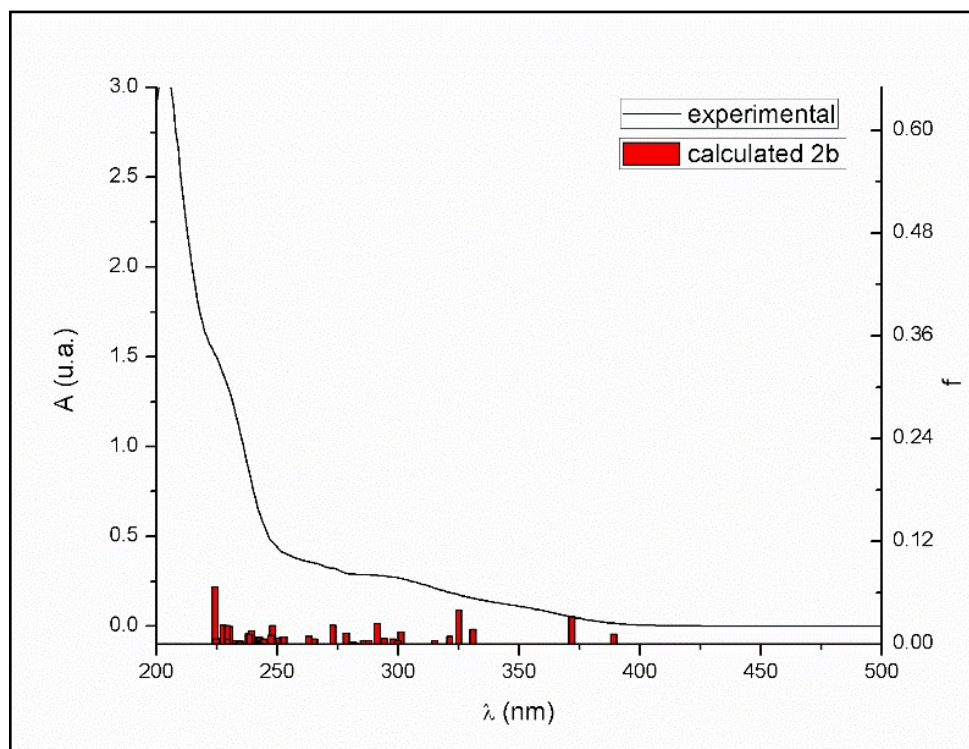

**Figure S12.** Experimental UV-Vis spectrum (black line) and electronic transitions (red bars) obtained for TD-DFT calculations of the complex **2b**.

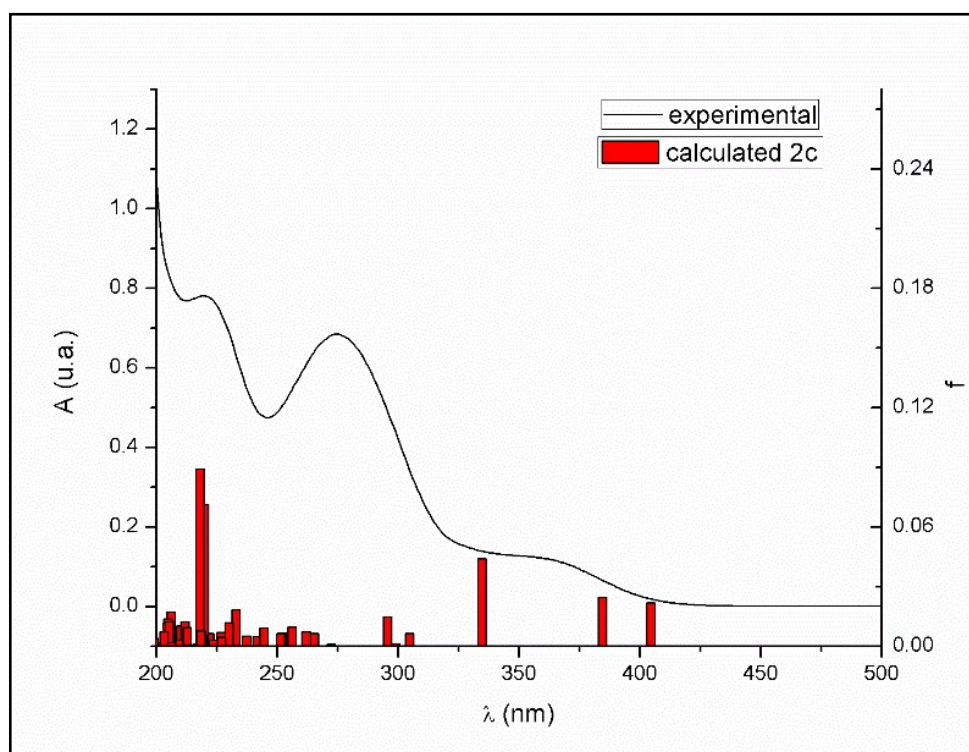

**Figure S13.** Experimental UV-Vis spectrum (black line) and electronic transitions (red bars) obtained for TD-DFT calculations of the complex **2c**.

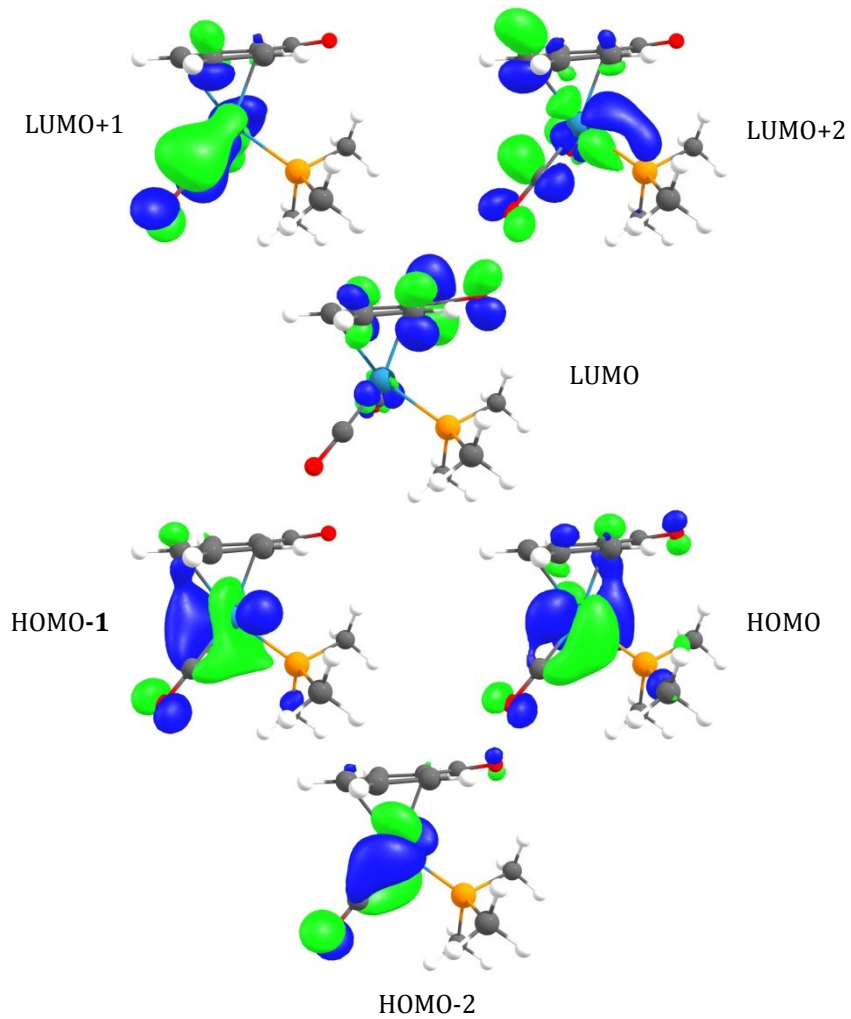

**Figure S14.** Calculated frontier orbitals of the complex **2a**.

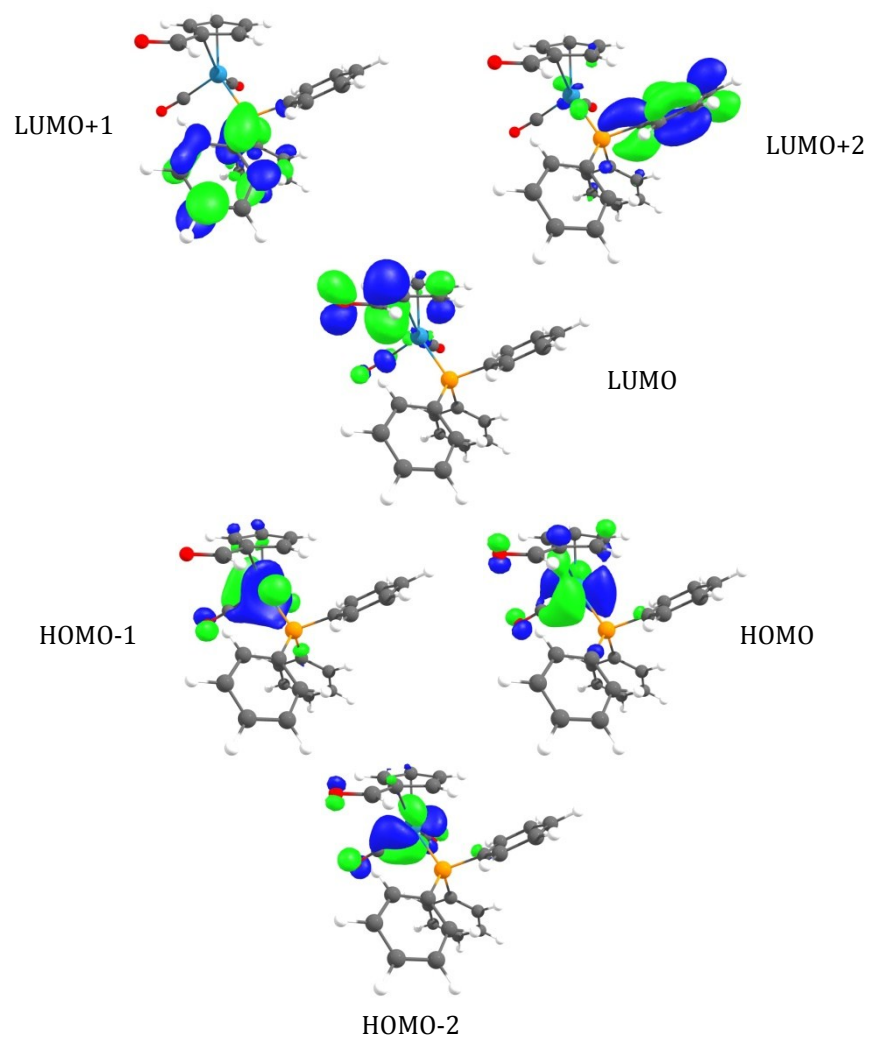

**Figure S15.** Calculated frontier orbitals of the complex **2b**.

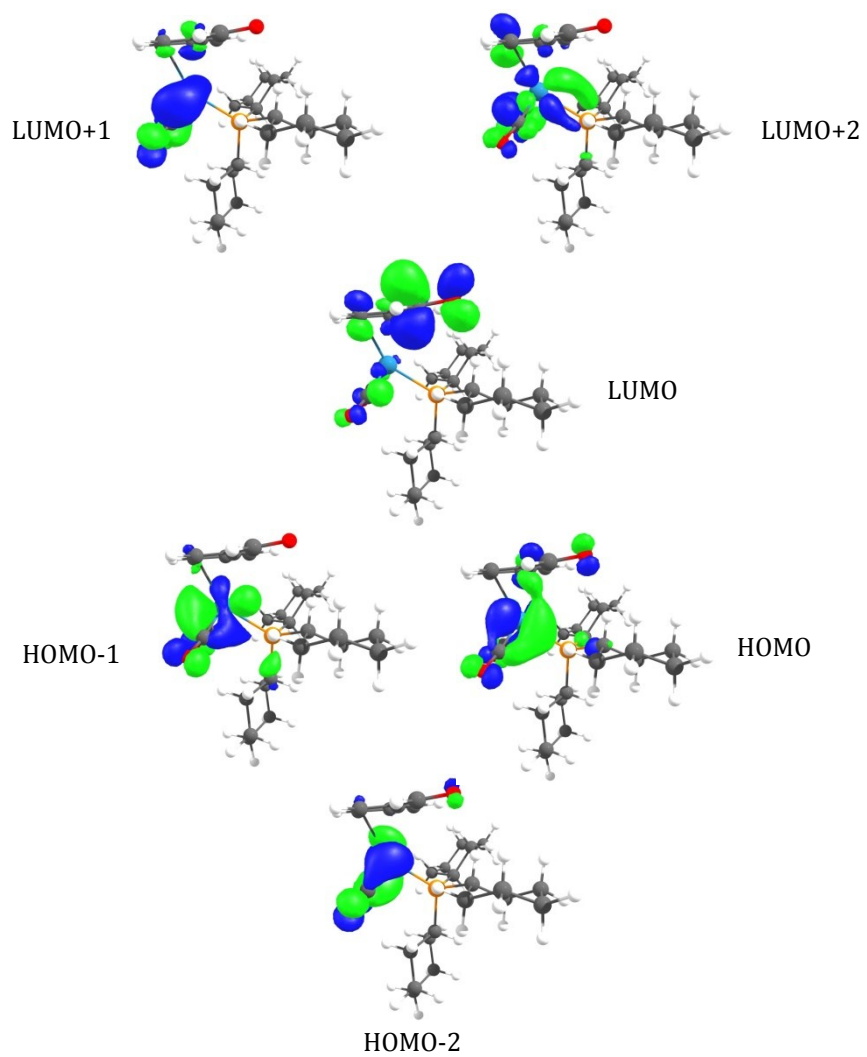

**Figure S16.** Calculated frontier orbitals of the complex **2c**.

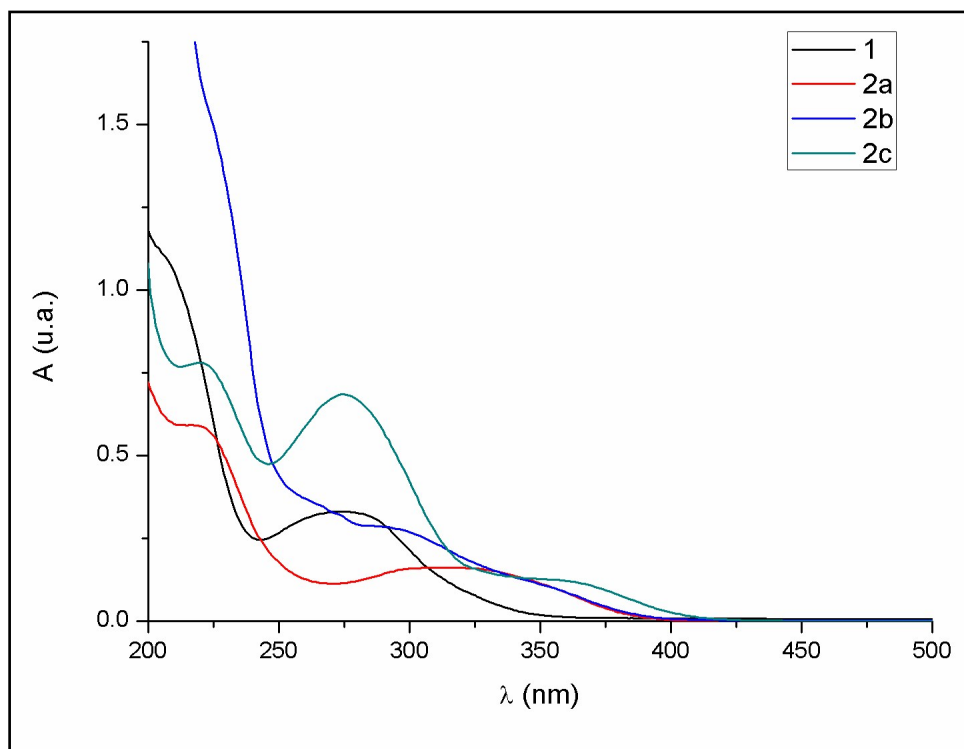

**Figure S17.** Experimental UV-Vis of  $10^{-4}$  M solutions of **1**, **2a-c** complexes in  $\text{CH}_3\text{CN}$  at 298 K.

## 2. Cytotoxicity studies

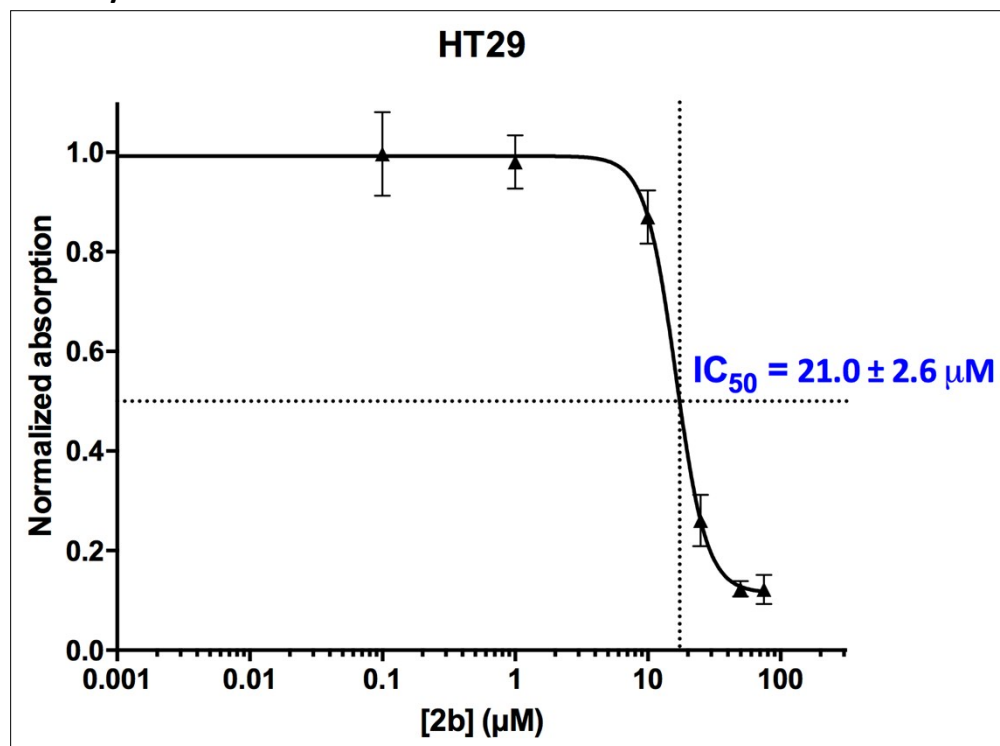

**Figure S18.** Biological Evaluation of **2b** in HT-29.

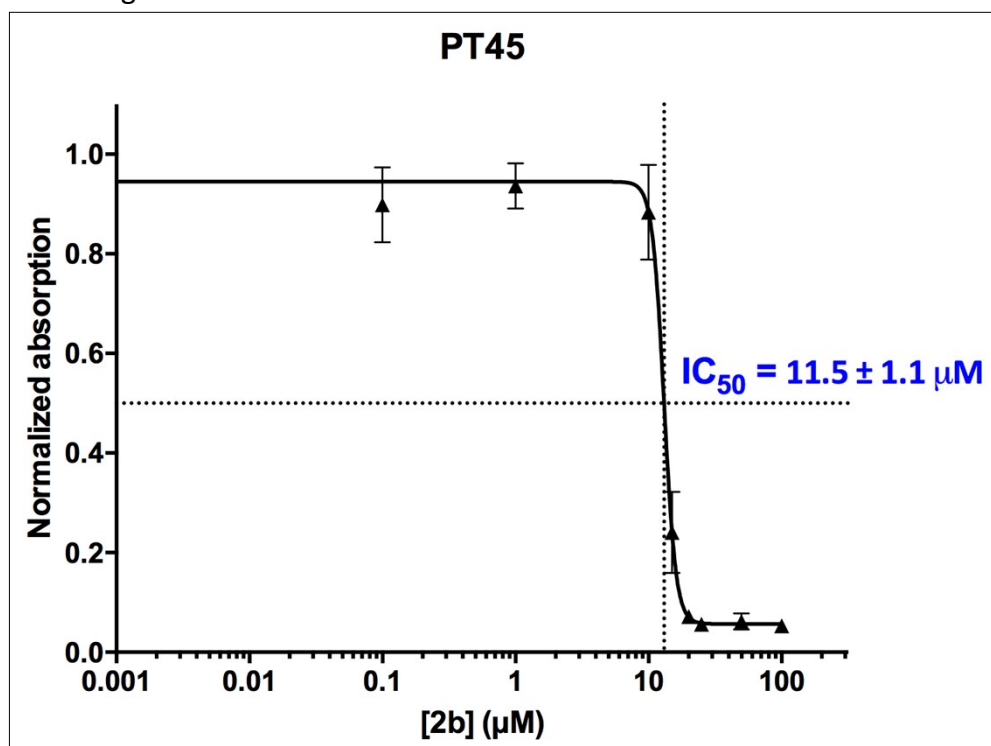

**Figure S19.** Biological Evaluation of **2b** in PT-45.
